# Supplementary material for: Synthesis and characterization of a bifunctional nanoprobe for CGG trinucleotide repeat detection
Source: Royal Society of Chemistry journal article supplement (doi:10.1039/c7ra05268e), 2017-01-01
Supplement: c7ra05268e1.pdf [file c7ra05268e1.pdf]

**Supporting Information For**

**Synthesis and characterization of a bifunctional nanoprobe for CGG  
trinucleotide repeat detection**

Xiaoqian Zhu,<sup>a</sup> Jiao Li,<sup>a</sup> Hehong Lv,<sup>a</sup> Hanping He,<sup>\*ab</sup> Heng Liu,<sup>ab</sup> Xiuhua Zhang<sup>ab</sup> and Shengfu Wang<sup>ab</sup>

a, Ministry of Education Key Laboratory for the Synthesis and Application of Organic Functional Molecules, College of Chemistry and Chemical Engineering, Hubei University, Youyi Road 368, Wuchang, Wuhan, Hubei 430062, PR China

b, Hubei Collaborative Innovation Center for Advanced Organic Chemical Materials, Hubei University, Youyi Road 368, Wuchang, Wuhan, Hubei 430062, PR China

\* Corresponding author, [hehanping@hubu.edu.cn](mailto:hehanping@hubu.edu.cn)

Table S1 The sequence information of DNA used in the present work

| Name                 | Sequence (5' end to 3' end)                         |
|----------------------|-----------------------------------------------------|
| SH-DNA               | HS-(CH <sub>2</sub> ) <sub>6</sub> -GGCCACGAGTTGACA |
| d(CGG) <sub>10</sub> | CGGCGGCGGCGGCGGCGGCGGCGGCGGCGGCGGTGTCAACTCGTGGCC    |
| d(TGG) <sub>10</sub> | TGGTGGTGGTGGTGGTGGTGGTGGTGGTGGTGGTGTCAACTCGTGGCC    |
| d(CCG) <sub>10</sub> | CCGCCGCCGCCGCCGCCGCCGCCGCCGCCGTGTCAACTCGTGGCC       |
| d(GAA) <sub>10</sub> | GAAGAAGAAGAAGAAGAAGAAGAAGAAGAATGTCAACTCGTGGCC       |
| d(CAG) <sub>10</sub> | CAGCAGCAGCAGCAGCAGCAGCAGCAGCAGTGTCAACTCGTGGCC       |
| d(CTG) <sub>10</sub> | CTGCTGCTGCTGCTGCTGCTGCTGCTGCTGCTGTGTCAACTCGTGGCC    |
| d(ATT) <sub>10</sub> | ATTATTATTATTATTATTATTATTATTATTGTCAACTCGTGGCC        |

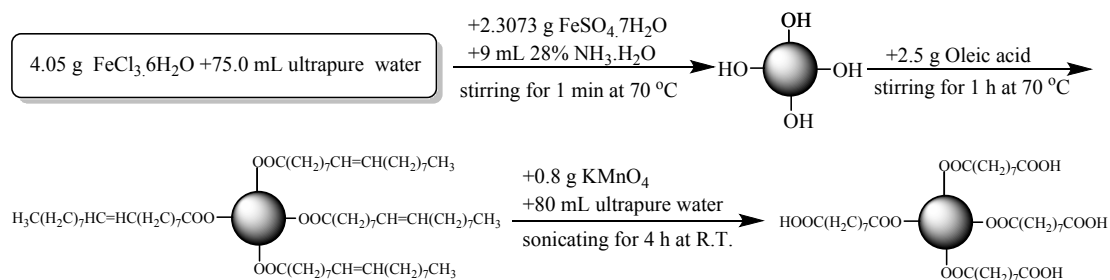

Scheme S1 Preparation process of carboxyl functionalized Fe<sub>3</sub>O<sub>4</sub> MNPs

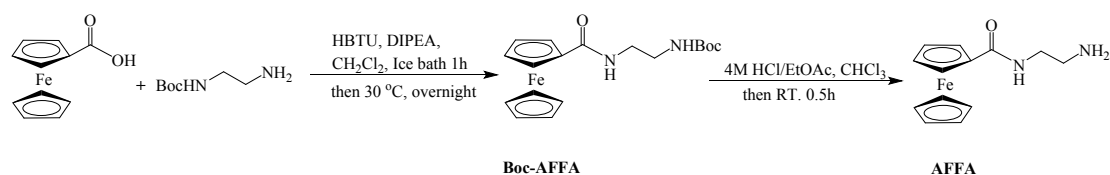

Scheme S2 Synthesis of N-(2-aminoethyl) ferrocenyl formamide (AFFA)

### Synthesis of N-(2-(N-(tert-butoxycarbonyl)) aminoethyl) ferrocenyl formamide (Boc-AFFA)

Ferrocenecarboxylic acid (345 mg, 1.5 mmol), HBTU (1.1377 g, 3.0 mmol) and DIPEA (1.0451 mL, 6.0 mmol) were dissolved in 30 mL CH<sub>2</sub>Cl<sub>2</sub> and the solution was stirred for 1 h in ice bath. Then N-(tert-butoxycarbonyl)-ethylenediamine (315.4 μL, 2.0 mmol) was added into the mixture and the mixture was stirred overnight at 30°C. The filtrate was concentrated followed by

washing with  $\text{Na}_2\text{CO}_3$  and  $\text{H}_2\text{O}$ , and drying over  $\text{Na}_2\text{SO}_4$ . The crude product was further purified by silica gel column chromatography using  $\text{CH}_2\text{Cl}_2/\text{CH}_3\text{OH}$  (v/v=50:1) as the eluent to give 253 mg saffron yellow solid with a 45% yield.  $R_f=0.6$ ,  $\text{CHCl}_3/\text{CH}_3\text{OH}$  (v/v=8:1).  $^1\text{H NMR}$  ( $\text{CDCl}_3$ , 600 MHz)  $\delta$ : 1.46(s, 9H), 3.37(t, 2H), 3.49(t, 2H), 4.20(s, 5H), 4.34(s, 2H), 4.69(s, 2H), and 6.61(s, 1H). LC-MS: Calculated for  $\text{C}_{18}\text{H}_{24}\text{FeN}_2\text{O}_3$  [(M+H) $^+$ ] 373.25, found 373.11.

### Synthesis of N-(2-aminoethyl) ferrocenyl formamide (AFFA)

Dissolve (1) (9.3 mg, 0.025 mmol) in 4 mL  $\text{CHCl}_3$  and 4 M  $\text{HCl}/\text{EtOAc}$  (2.0 mL) was added dropwise into the solution under stirring in ice bath. The mixture was stirred for 0.5 h at room temperature. The mixture was evaporated in vacuo to get the residue. The residue was washed successively with  $\text{CHCl}_3$  followed by evaporating in a vacuum on a rotary evaporator to get AFFA that would be used in the next modification of CMNPs. LC-MS: Calculated for  $\text{C}_{13}\text{H}_{16}\text{FeN}_2\text{O}$  [(M+H) $^+$ ] 273.13, found 273.06.

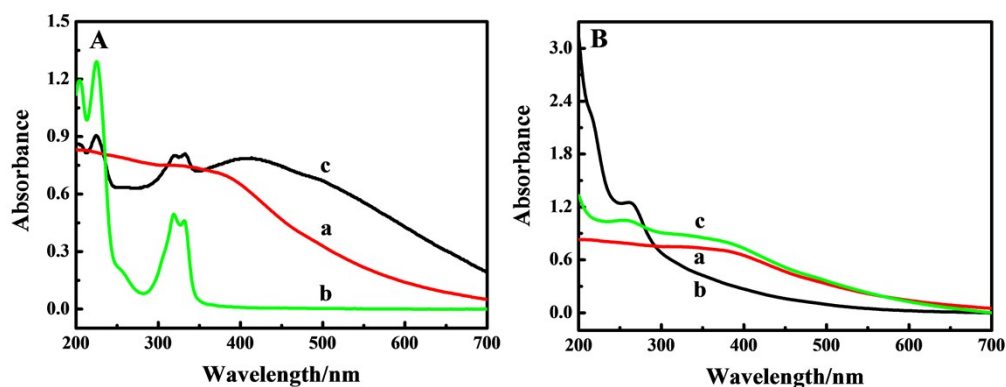

Figure S1 (A) UV-vis spectra of CMNPs (a), NC-linker (b) and NC-linker modified CMNPs (c); (B) UV-vis spectra of CMNPs (a), AFFA (b) and AFFA modified CMNPs (c).
